# Supplementary material
Source: PubMed Central journal article supplement (PMC3551537)
Supplement: NIHMS432661-supplement-Supplementary_Table_1.pdf [file NIHMS432661-supplement-Supplementary_Table_1.pdf]

Supplementary Table 1. Correlation between sleep measurements

|                           | Sleep time | Efficiency <sup>a</sup> | Latency <sup>b</sup> | WASO <sup>c</sup> | Feeling rested<br>(diary) | How compare<br>to a usual<br>night (diary) |
|---------------------------|------------|-------------------------|----------------------|-------------------|---------------------------|--------------------------------------------|
| Sleep time                | --         | -.25 <sup>d</sup>       | .22                  | .00               | .16                       | .13                                        |
| Efficiency <sup>a</sup>   |            | ---                     | .55 <sup>e</sup>     | .84 <sup>e</sup>  | .03                       | .02                                        |
| Latency <sup>b</sup>      |            |                         | --                   | .40 <sup>e</sup>  | -.09                      | .03                                        |
| WASO <sup>c</sup>         |            |                         |                      | --                | .02                       | .05                                        |
| Feeling rested<br>(diary) |            |                         |                      |                   | --                        | .23                                        |

<sup>a</sup> Natural log transformed on (100 - Efficiency); <sup>b</sup> Natural log transformed; <sup>c</sup> Square root transformed

<sup>d</sup>p<0.10, <sup>e</sup>p<0.01
